# Supplementary material for: YAP regulates alveolar epithelial cell differentiation and AGER via NFIB/KLF5/NKX2-1
Source: PubMed Central journal article supplement — iScience. 2021 Aug 11;24(9):102967. doi: 10.1016/j.isci.2021.102967 (PMC8383002; doi:10.1016/j.isci.2021.102967), 2021-08-11
Supplement: mmc1.pdf [file mmc1.pdf]

iScience, Volume 24

## Supplemental information

### **YAP regulates alveolar epithelial cell differentiation and *AGER* via NFIB/KLF5/NKX2-1**

**Jason J. Gokey, John Snowball, Anusha Sridharan, Parvathi Sudha, Joseph A. Kitzmiller, Yan Xu, and Jeffrey A. Whitsett**

Figure S1

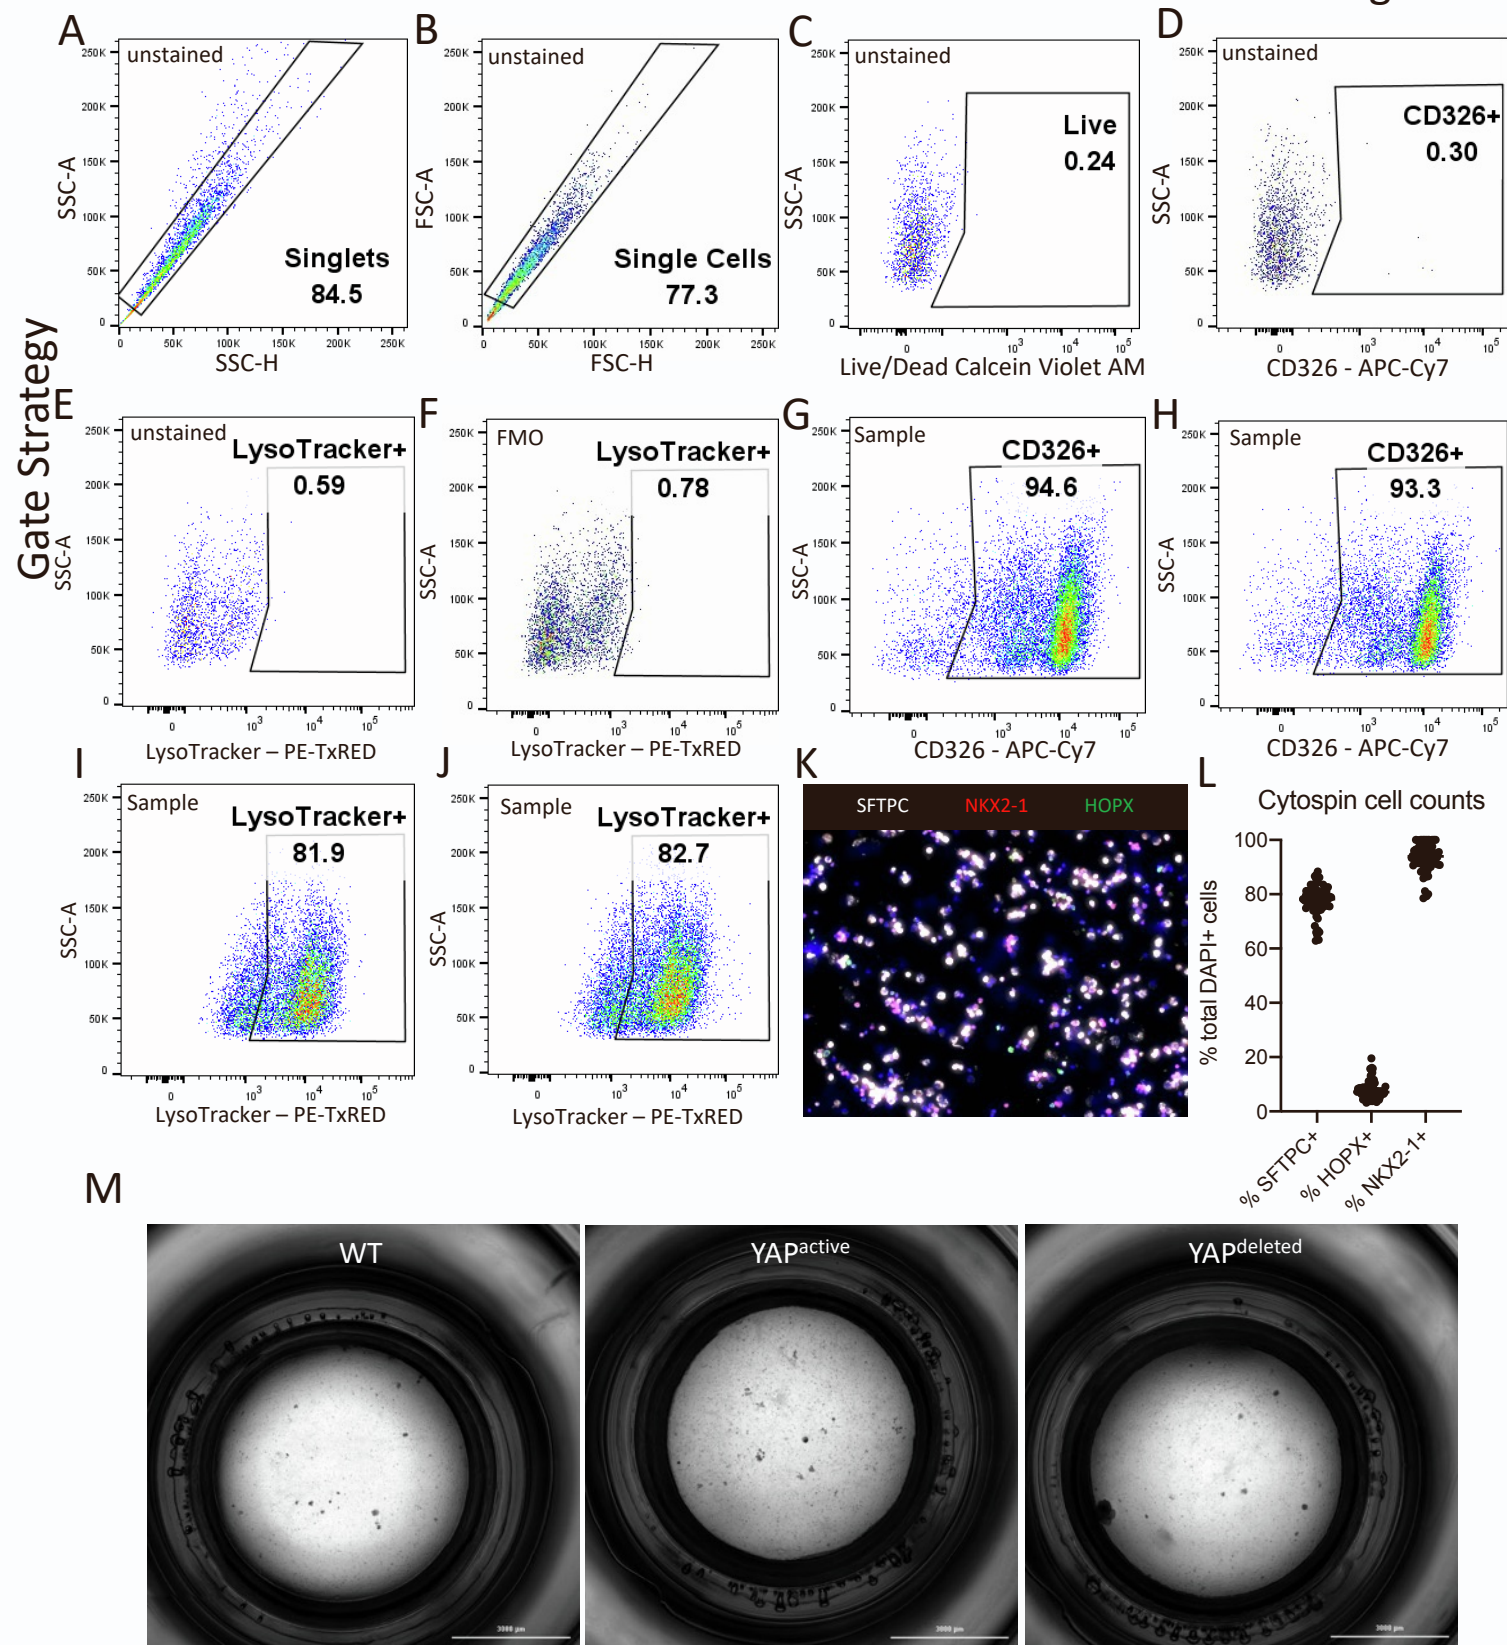

**Figure S1:** Gating strategy to test the purity of alveolar epithelial cell enrichment, related to Figure 3. Alveolar epithelial cells were isolated from wild-type (*Stk3<sup>flox/flox</sup>Stk4<sup>flox/flox</sup>*) (N=2) and subjected to FACS analysis utilizing Calcein Violet AM to detect live cells (cells had greater than 95% viability), CD326+ to identify epithelial cells and CD326+/LysoTracker+ cells to quantify AT2 cells. A-F.) Representative examples of side scatter, forward scatter, unstained samples, and LysoTracker FMO to establish gating strategy. G,H) Analysis of CD326+ cells demonstrating greater than 93% epithelial cells from the isolated cells. I,J) Analysis of CD326+/LysoTracker+ cells demonstrating greater than 80% AT2 cell population in isolated cells. K) Representative 20X image of immunofluorescence analysis of SFTPC, HOPX, and NKX2-1 on cytopins of isolated cells. L) Quantification of SFTPC+, HOPX+, and NKX2-1+ cells, each point of the graph represents analysis of a 20X image of cells isolated from N=2 mice, 36 images from each cytopin. M) Brightfield microscope images showing whole wells of organoid cultures generated with PND14 WT, YAP<sup>active</sup>, and YAP<sup>deleted</sup> AT2 cells co-cultured with PND14 WT fibroblasts after 21 days of culture.

AT1 Transcriptional Network

Figure S2

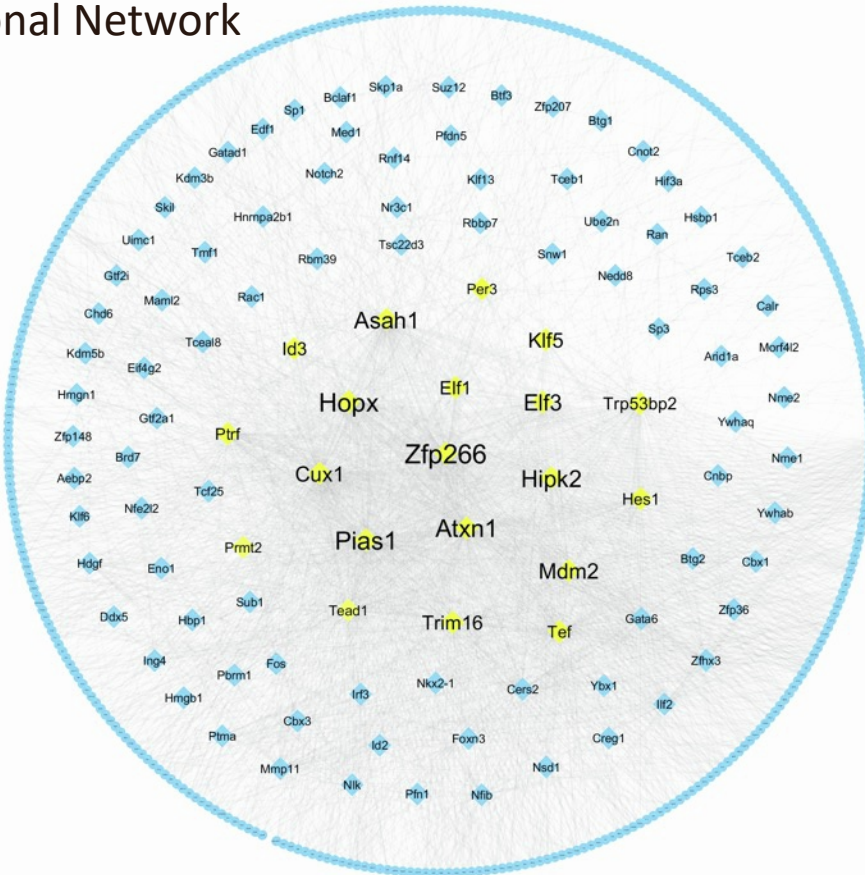

AT2 Transcriptional Network

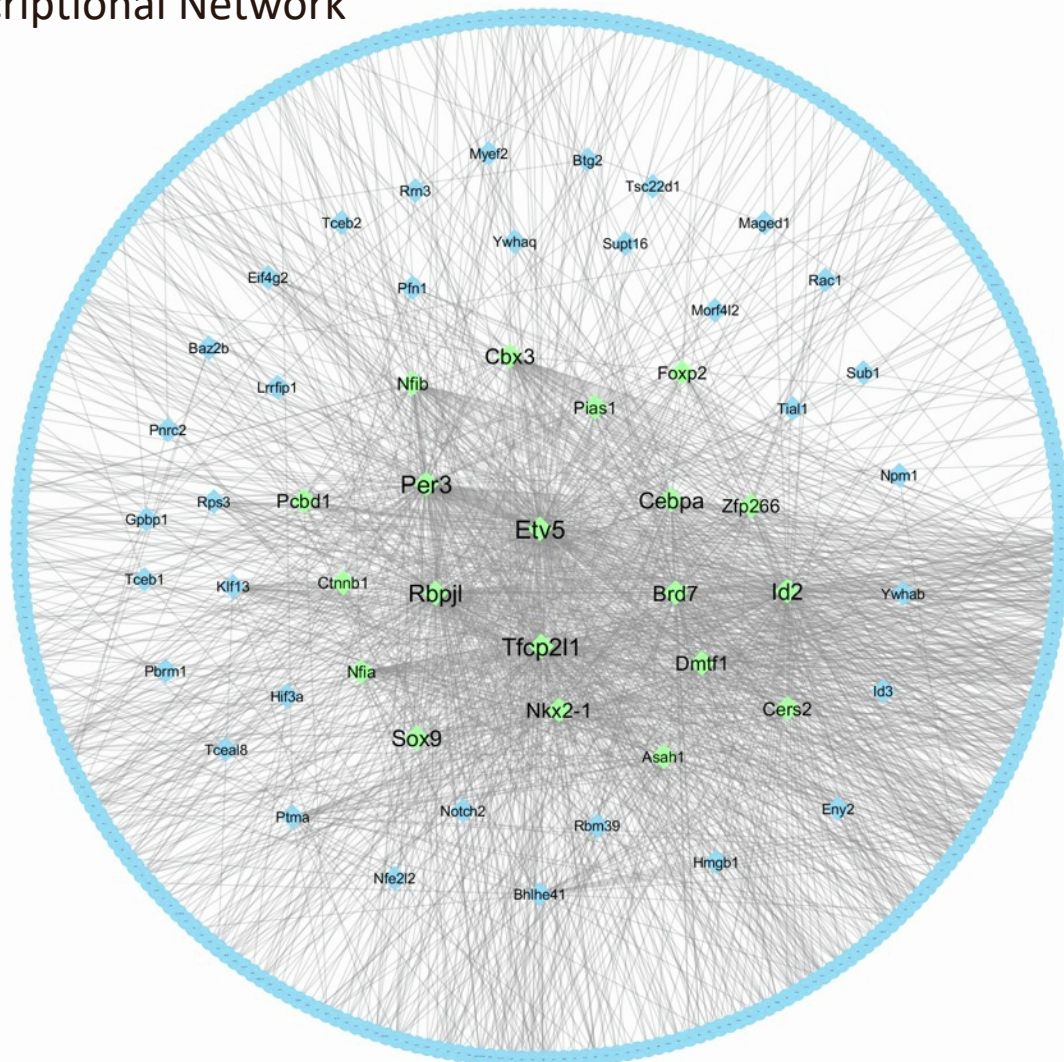

**Figure S2:** Transcriptional Regulatory Networks of predicted upstream drivers of gene changes associated with AT1 and AT2 cell differentiation, related to Figure 4.

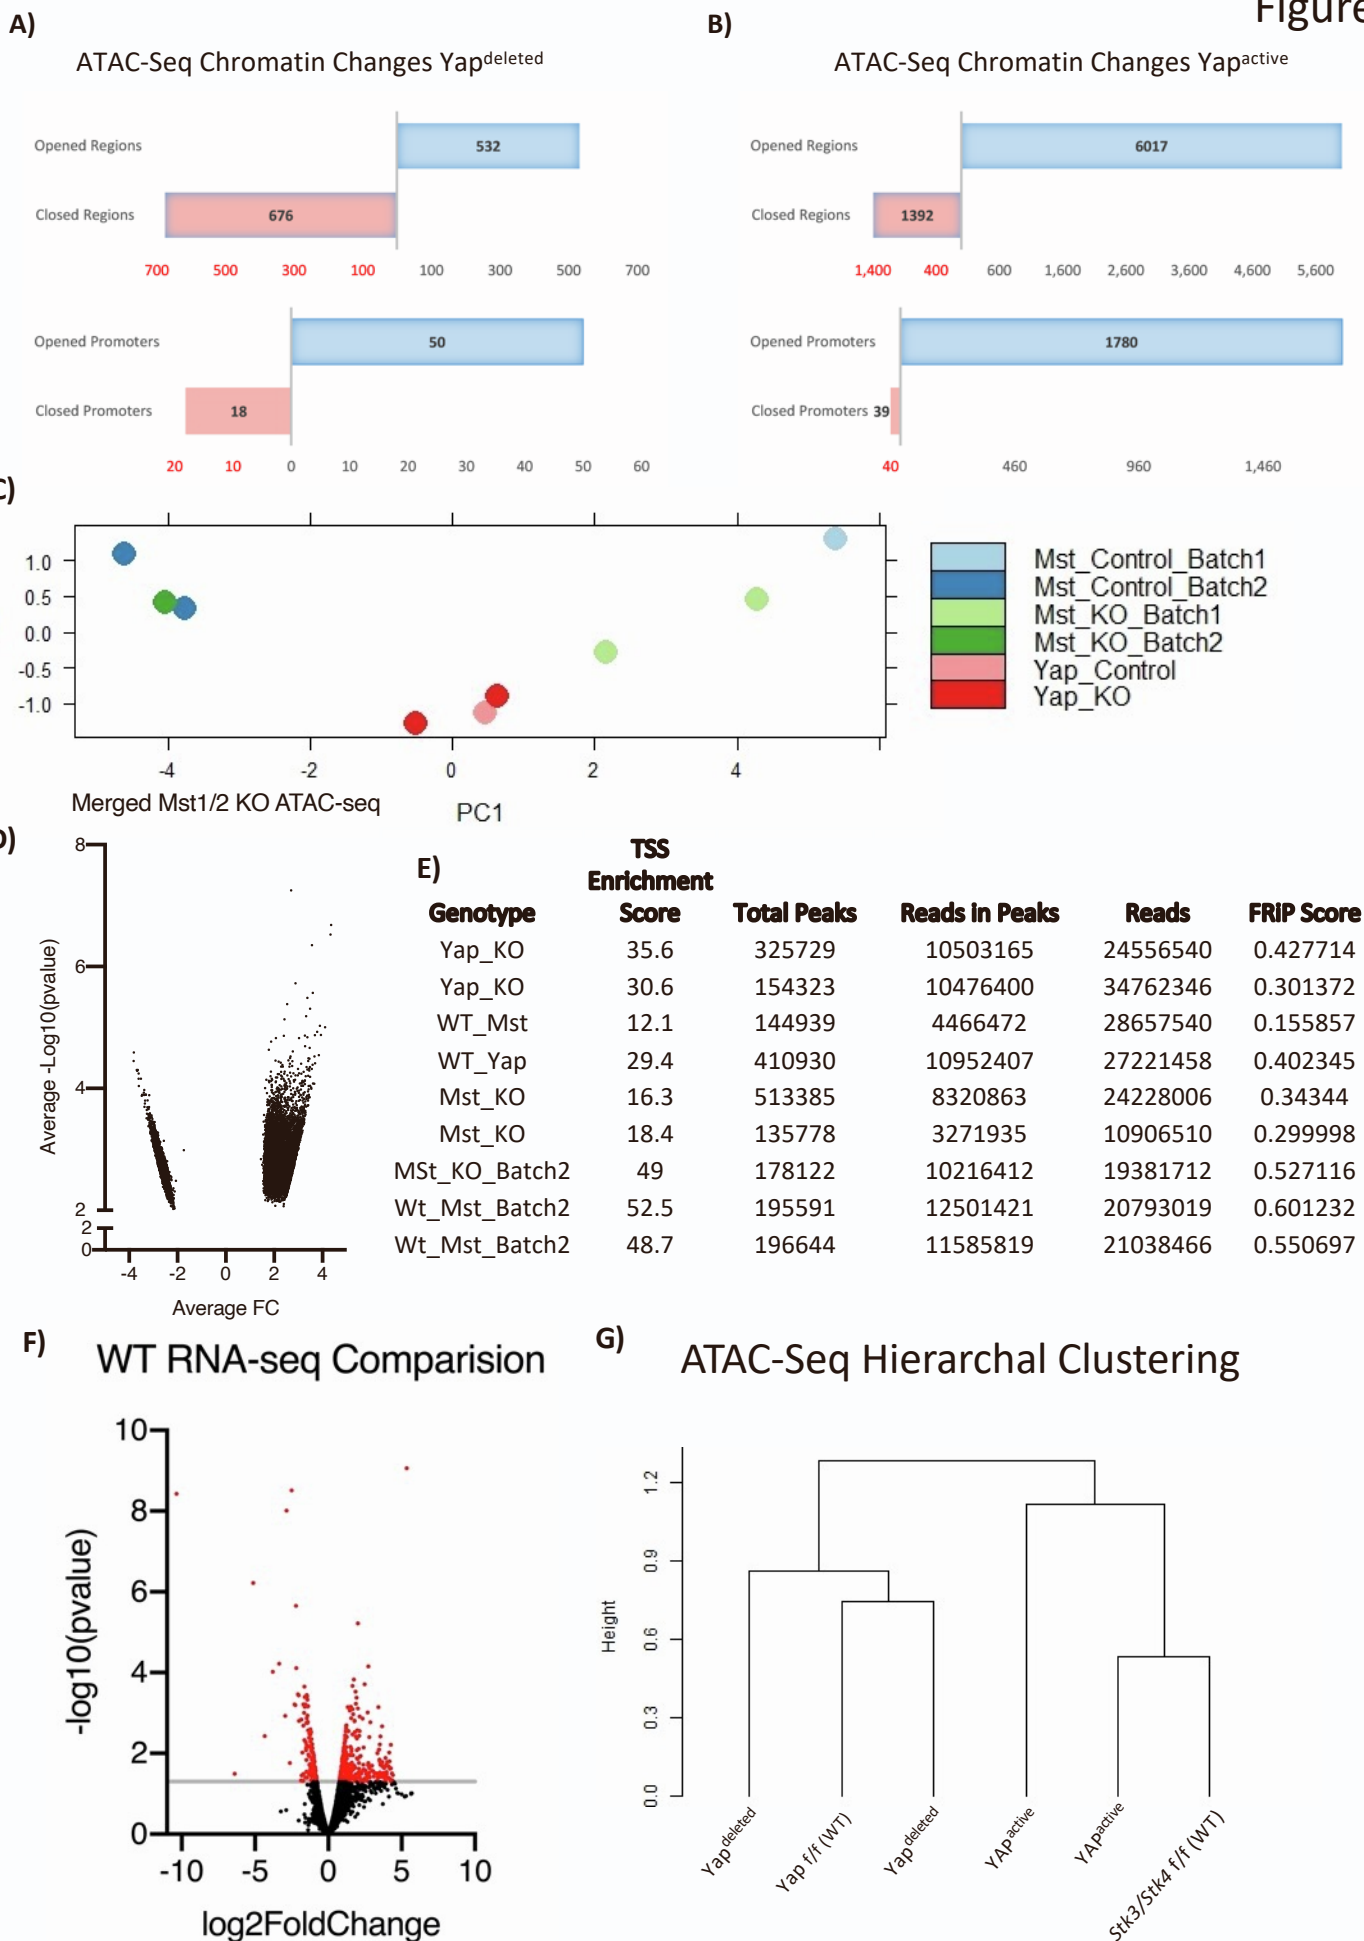

**Figure S3:** Chromatin accessibility in epithelial cells isolated from YAP<sup>deleted</sup> mice related to Figure 5 and Figure 7. A) ATAC-seq analyses of YAP<sup>deleted</sup> lung epithelium, by Homer, showed few changes in DNA accessibility after YAP deletion. B) An identical Homer analysis of YAP activated lung epithelial cells shows increased DNA accessibility. ATAC-seq analyses were performed on EPCAM+ cells comparing YAP<sup>deleted</sup> mice (N=2) to a littermate control. Only regions opened in both mutant replicates were considered significant. Analysis of WT littermates shows background differences in *Yap*<sup>flox/flox</sup> and *Stk3*<sup>flox/flox</sup> *Stk4*<sup>flox/flox</sup> control mice. ATAC-seq and RNA-seq was performed on EPCAM+ lung cells isolated from controls mice of both YAP<sup>deleted</sup> and YAP<sup>active</sup> backgrounds. YAP activation opened the chromatin accessibility of 1780 promoters in initial 1 vs 1 comparison. Further samples were assessed for Figure 7A. C.) PCA plot of ATAC-seq from individual samples shows the different clustering between batches of samples, therefore requiring individual analysis of each batch of samples. D.) Volcano plot of opened and closed promoters in YAP active mice. E.) Quality control assessment of TSS enrichment score, total peaks, reads, and FRIP score for each ATAC-seq sample. F.) A volcano plot of the 467 differentially expressed genes ( $p < .05$ ,  $FC > 1.5$ ) show baseline differences between the two backgrounds. G.) Hierarchical clustering of open DNA coding regions showed control mice cluster better with their mutant littermates.

Analysis of genes downregulated in YAP<sup>active</sup> mice

| Category               | Name                                          | p-value  | Hit Count in Query List | Hit Count in Genome |
|------------------------|-----------------------------------------------|----------|-------------------------|---------------------|
| GO: Biological Process | Mesenchyme development                        | 7.4E-06  | 13                      | 312                 |
| GO: Cellular Component | Extracellular matrix                          | 3.92E-05 | 17                      | 598                 |
| ToppCell Atlas         | Lungmap Lungmap - Mouse FluidigmC1 Fibroblast | 6.21E-11 | 55                      | 1840                |
| ToppCell Atlas         | Lungmap Mouse Lung PND1 MyoFB Subtype MyoFB-A | 1.15E-10 | 19                      | 243                 |



**Table S1:** Biological processes associated with genes downregulated in YAP<sup>active</sup> AT2 cells, related to Figure 6.

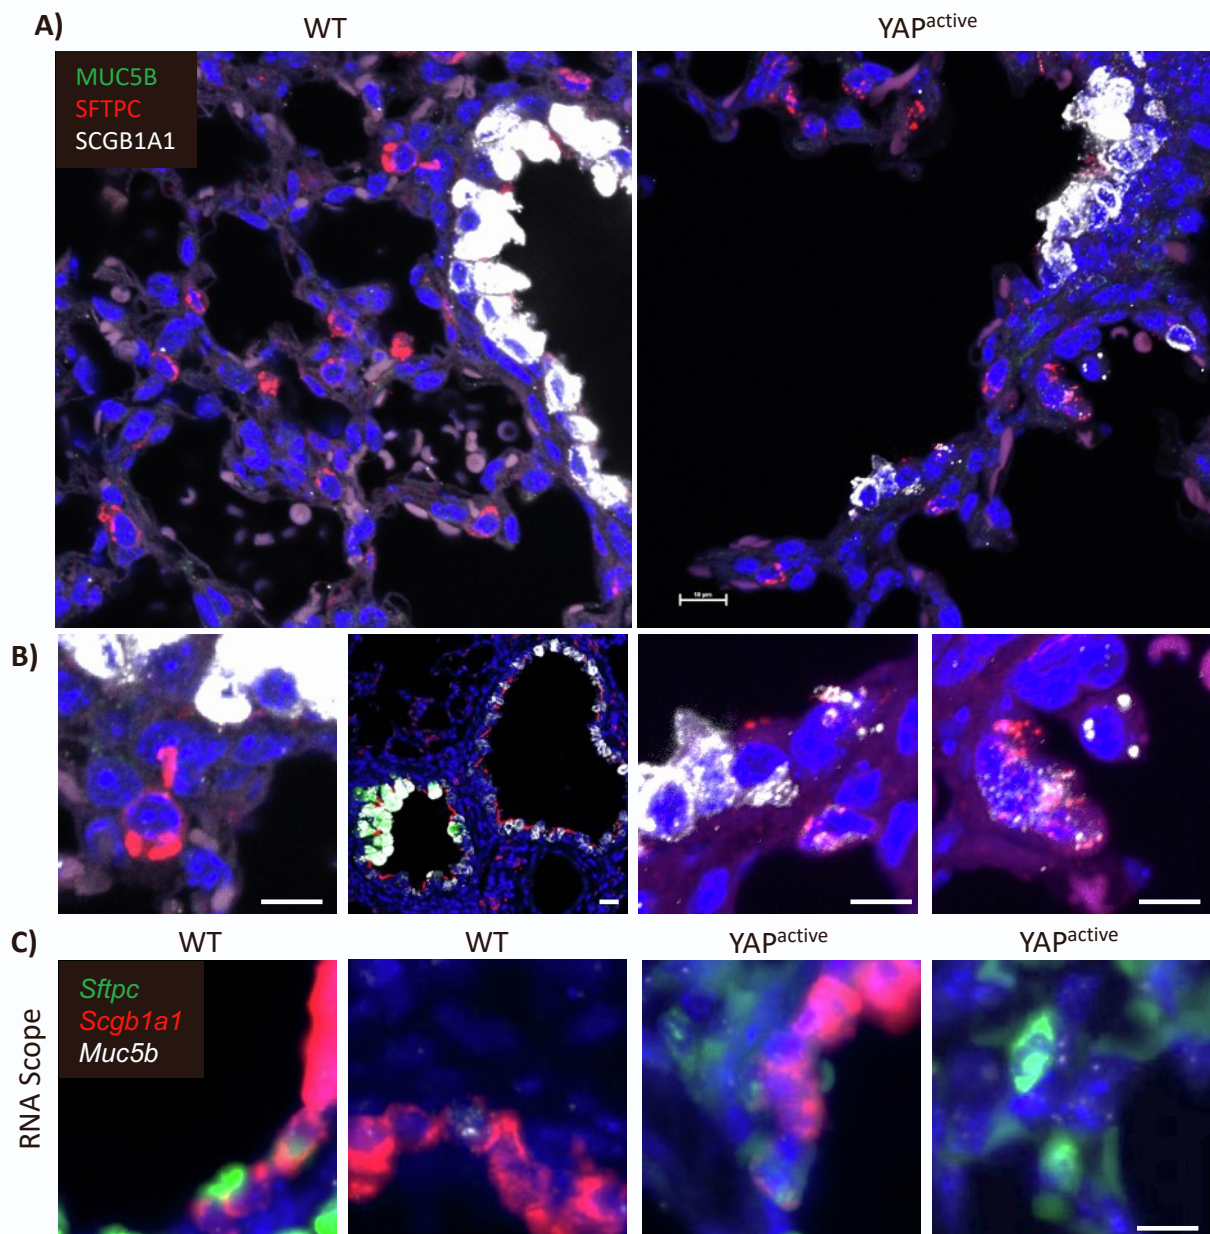

**Figure S4:** Immunofluorescence images of proximal markers in AT2 cells, related to Figures 6. A,B.) Immunofluorescence staining of MUC5B (green), SFTPC (red), and SCGB1A1 (white) demonstrates co-localization of SFTPC and SCGB1A1 but not MUC5B in epithelial cells in YAP<sup>active</sup> mice. C.) RNAscope fluorescent in-situ hybridization of *Muc5b*, *Scgb1a1*, and *Sftpc* demonstrating the presence of potential BASC cells and the localization of *Muc5b* in WT and YAP<sup>active</sup> mice.

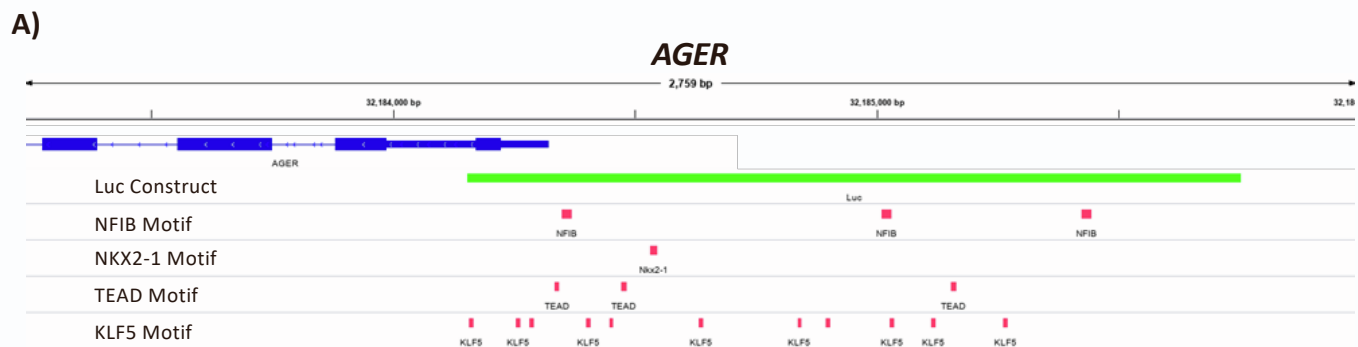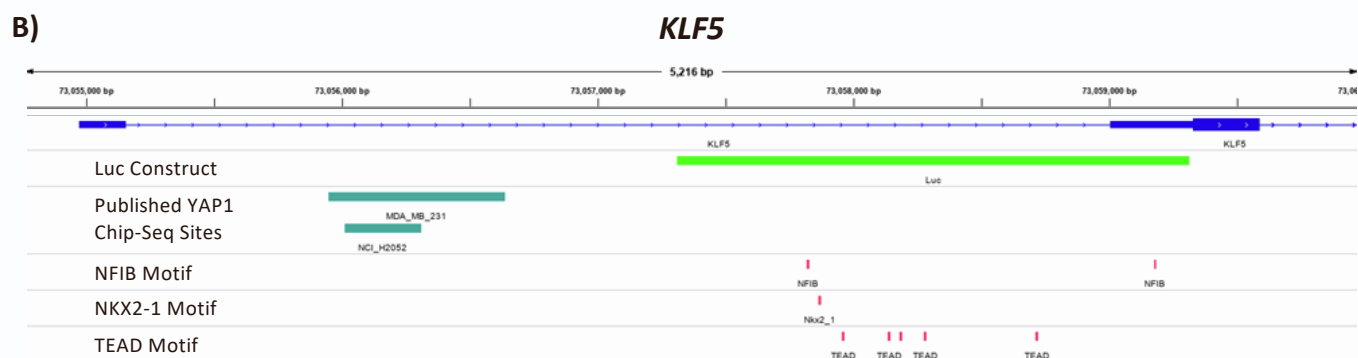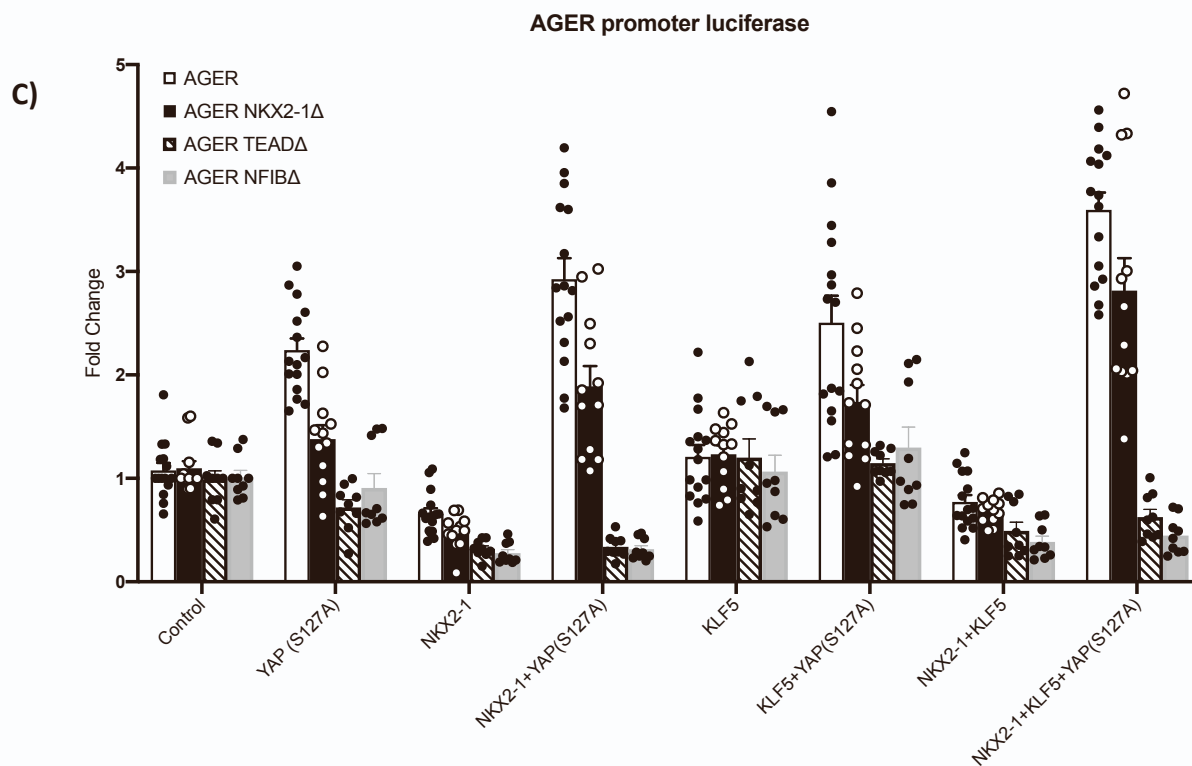

**Figure S5:** *KLF5* and *AGER* promoter regions have consensus KLF5, TEAD, NKX2-1, and NFIB binding sites, related to Figure 7. Luciferase promoter analyses of *KLF5* and *AGER*, genes induced in YAP<sup>active</sup> mice, identify motifs for transcription factors predicted to regulate AT1 and AT2 differentiation. A) The genomic location of the *Ager* promoter used for the luciferase construct is shown (green) with the location of consensus NFIB, NKX2-1, TEAD and KLF5 DNA binding sites located in close proximity. B) The location of the *KLF5* promoter used for the luciferase construct is shown (green) with previously reported YAP1 ChIP-seq binding sites (turquoise). Locations of NKX2-1, TEAD and NFIB potential binding sites are shown (red). Consensus DNA binding sites were identified using Meme suite's Fimo package,  $p < .0005$ . C.) Full analysis of increased luciferase promoter activity in *AGER* luciferase assay with site mutagenesis in NFIB, NKX2-1, and TEAD predicted binding sites in the presence of YAP, NKX2-1, and KLF5 expression.

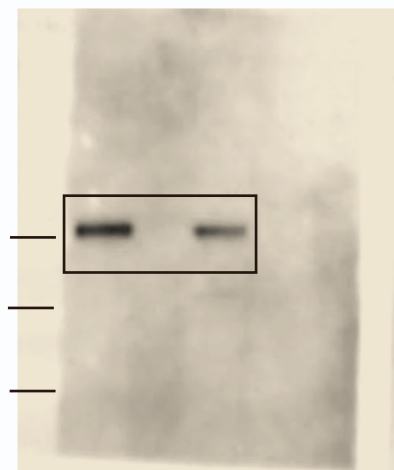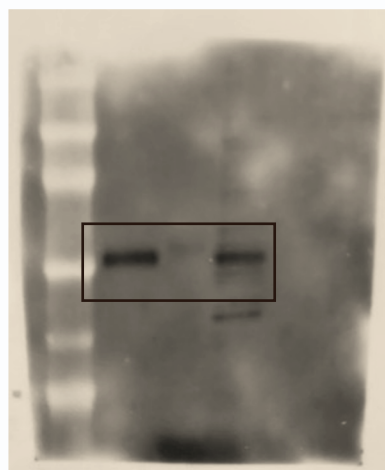

NFIB

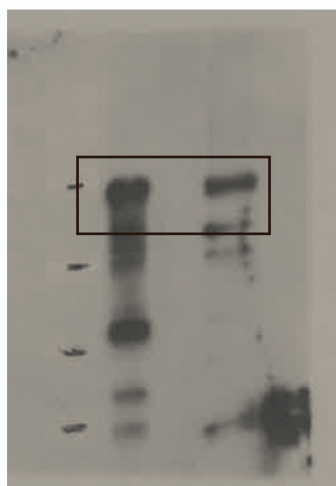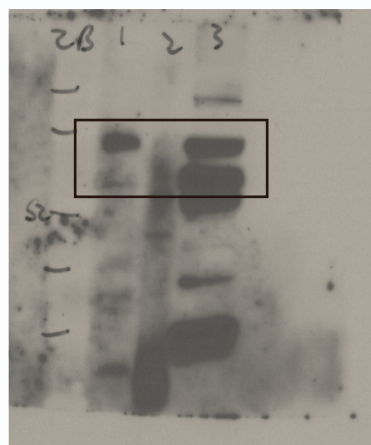

YAP (S127A)

**Figure S6:** Full blots of the gels for the immunoprecipitation assays from Figure 8 are shown. Regarding the ladder locations, images are scans of blots imaged on film, with the film subsequently overlaid on the blot and marker lines were drawn in to mark ladder locations.
